# Supplementary material for: In situ analysis of cross-hybridisation on microarrays and the inference of expression correlation
Source: PubMed Central journal article supplement (PMC2213692; doi:10.1186/1471-2105-8-461), 2007-11-26

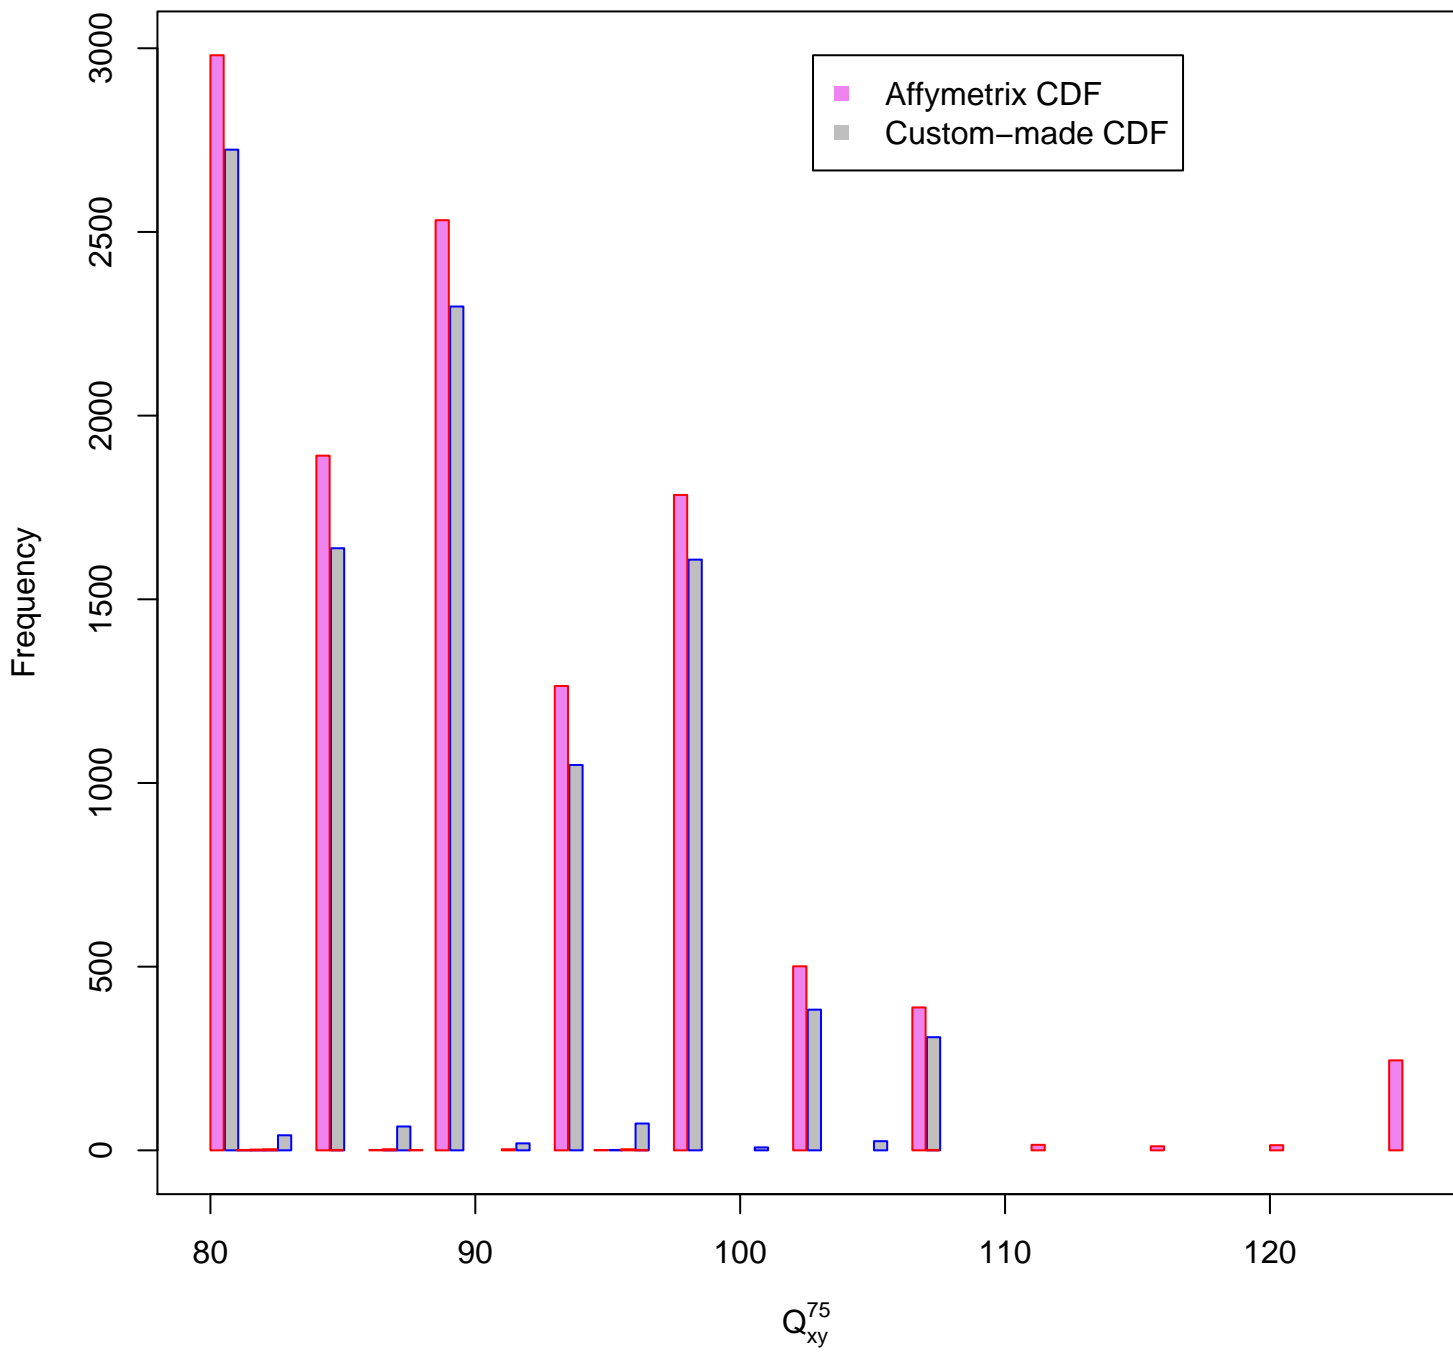

Supplement: 1471-2105-8-461-S1.pdf [file 1471-2105-8-461-S1.pdf]
